# Supplementary material for: An EMT-related genes signature as a prognostic biomarker for patients with endometrial cancer
Source: PubMed Central journal article supplement (PMC10506329; doi:10.1186/s12885-023-11358-4), 2023-09-18

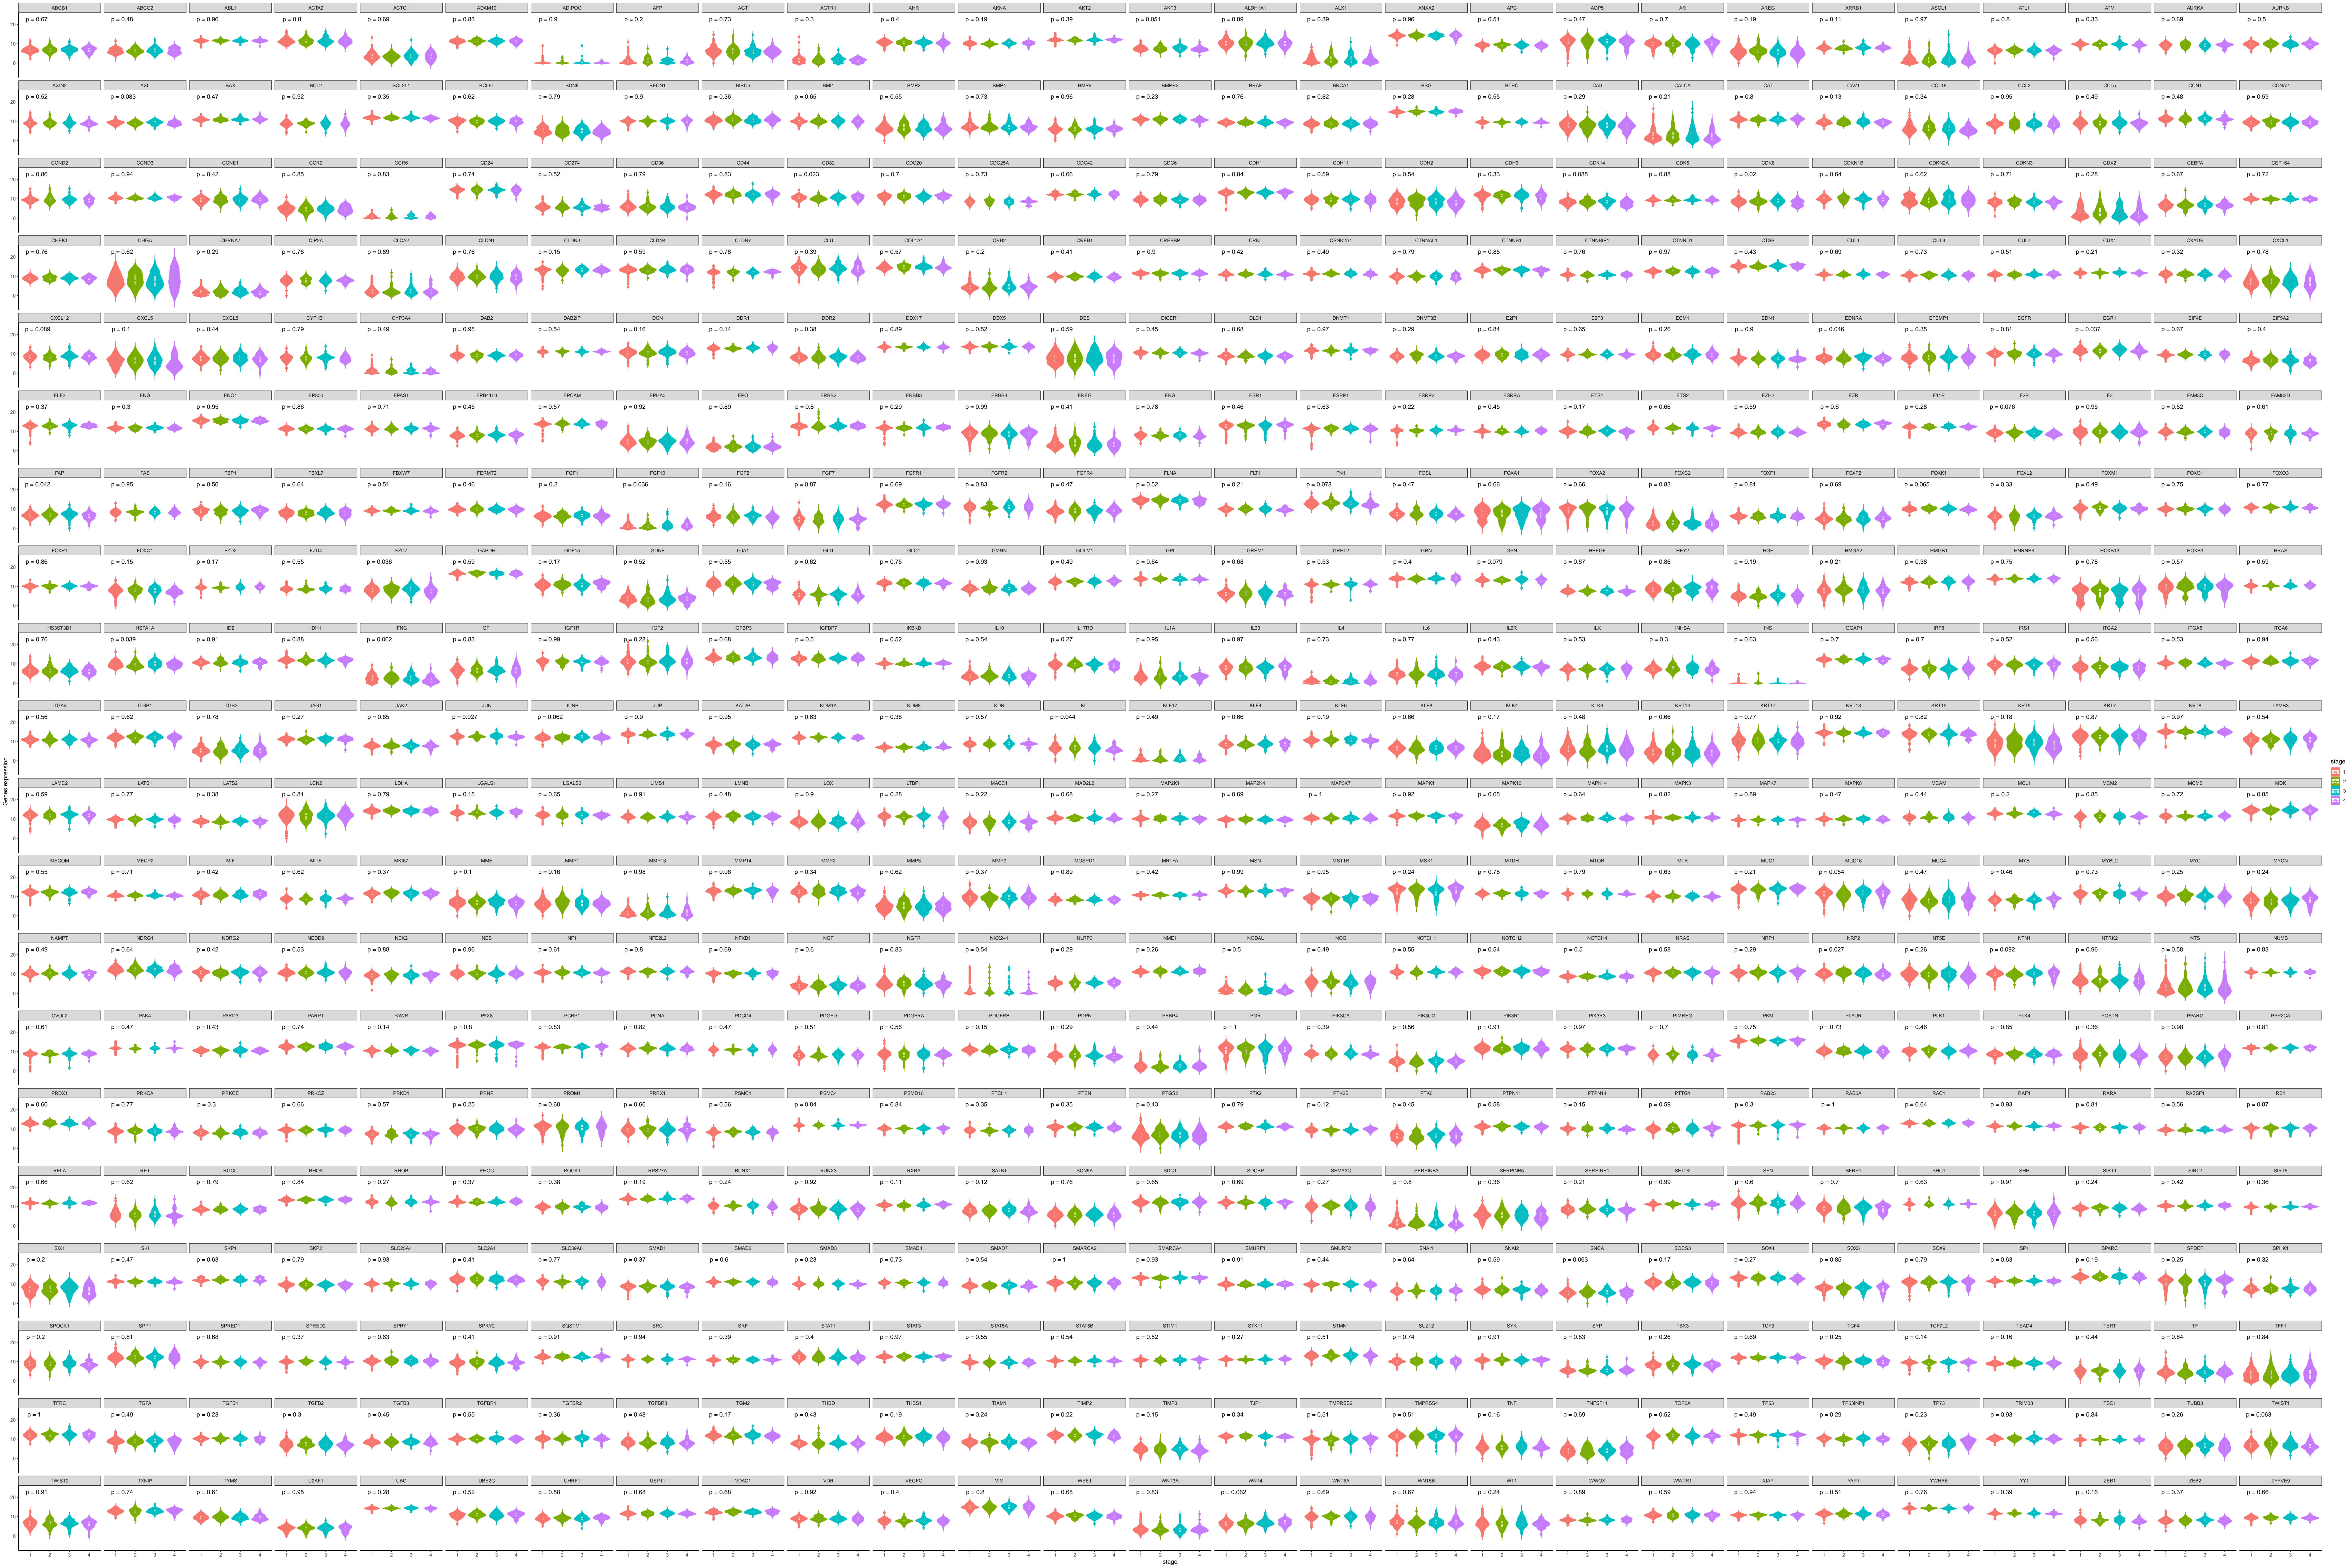

Supplement: 12885_2023_11358_MOESM1_ESM.pdf [file 12885_2023_11358_MOESM1_ESM.pdf]
